# Supplementary material for: Reduction of Cd Uptake in Rice (Oryza sativa) Grain Using Different Field Management Practices in Alkaline Soils
Source: MDPI journal article supplement (doi:10.3390/foods12020314), 2023-01-09

**Figure S1.** Experimental field, with different amendments.

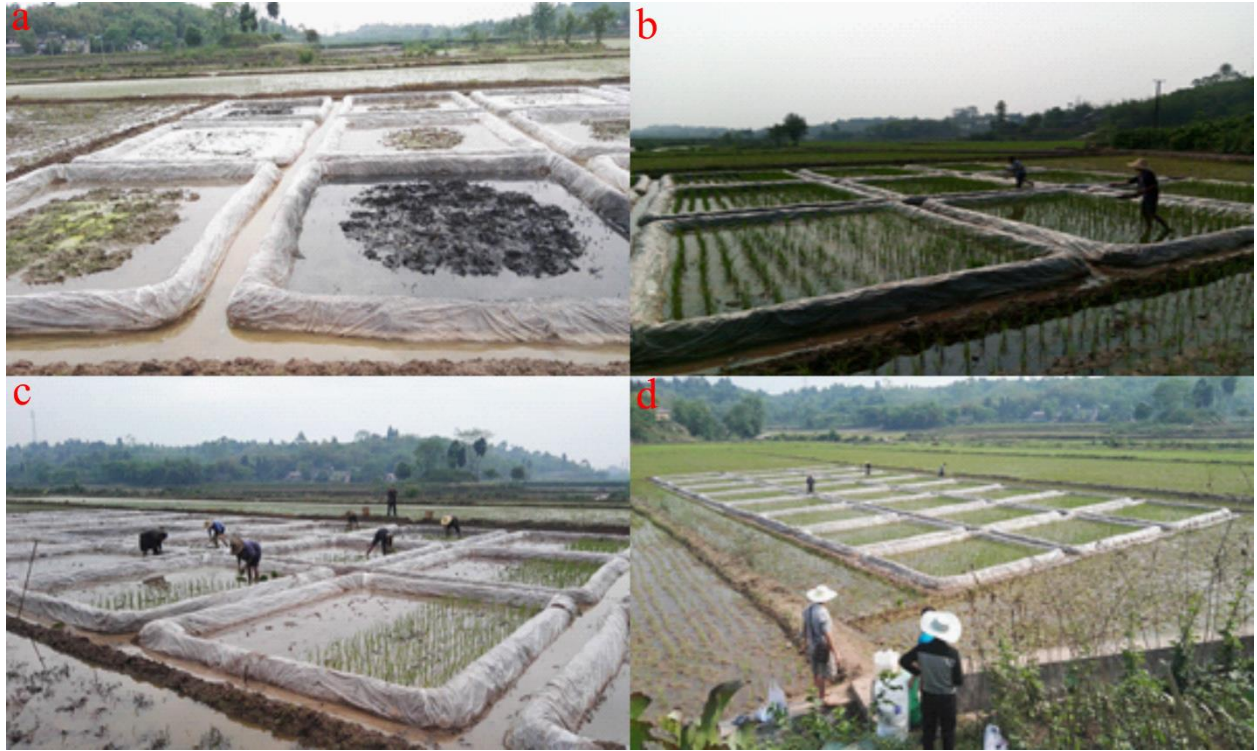

**Figure S2.** Sampling of Cd-contaminated soil from different layers of soil

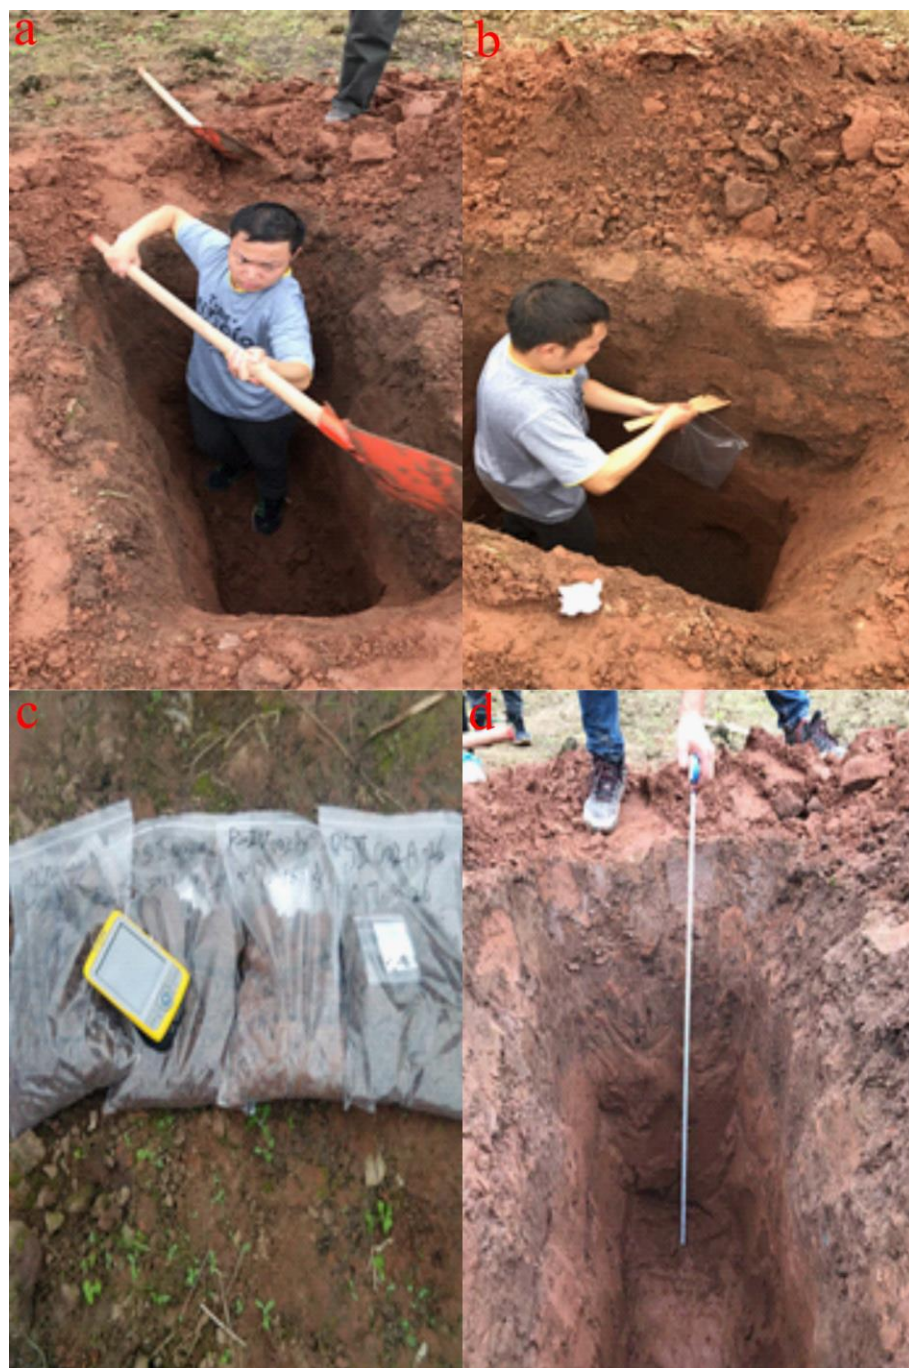

**Figure. S3.** Irrigation water sampling from different sources.

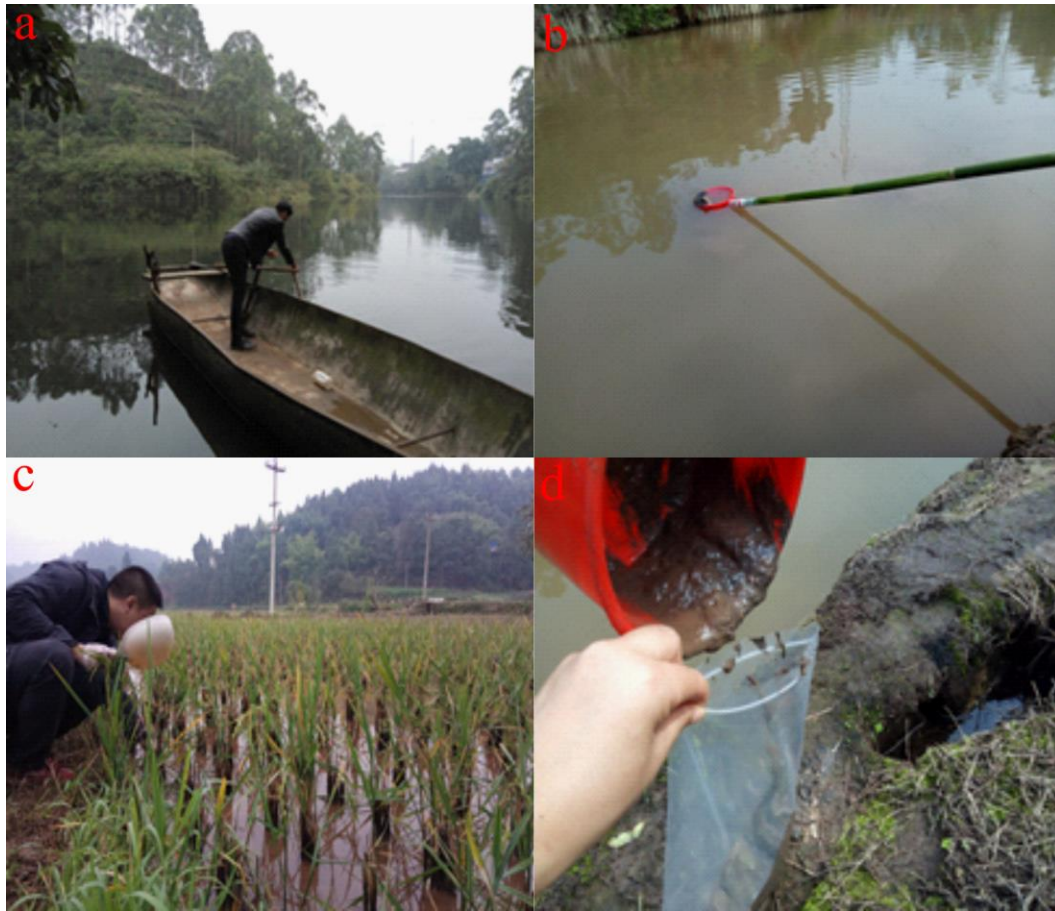



**Figure S4.** The sampling of wall mud, from a 100-year-old building.

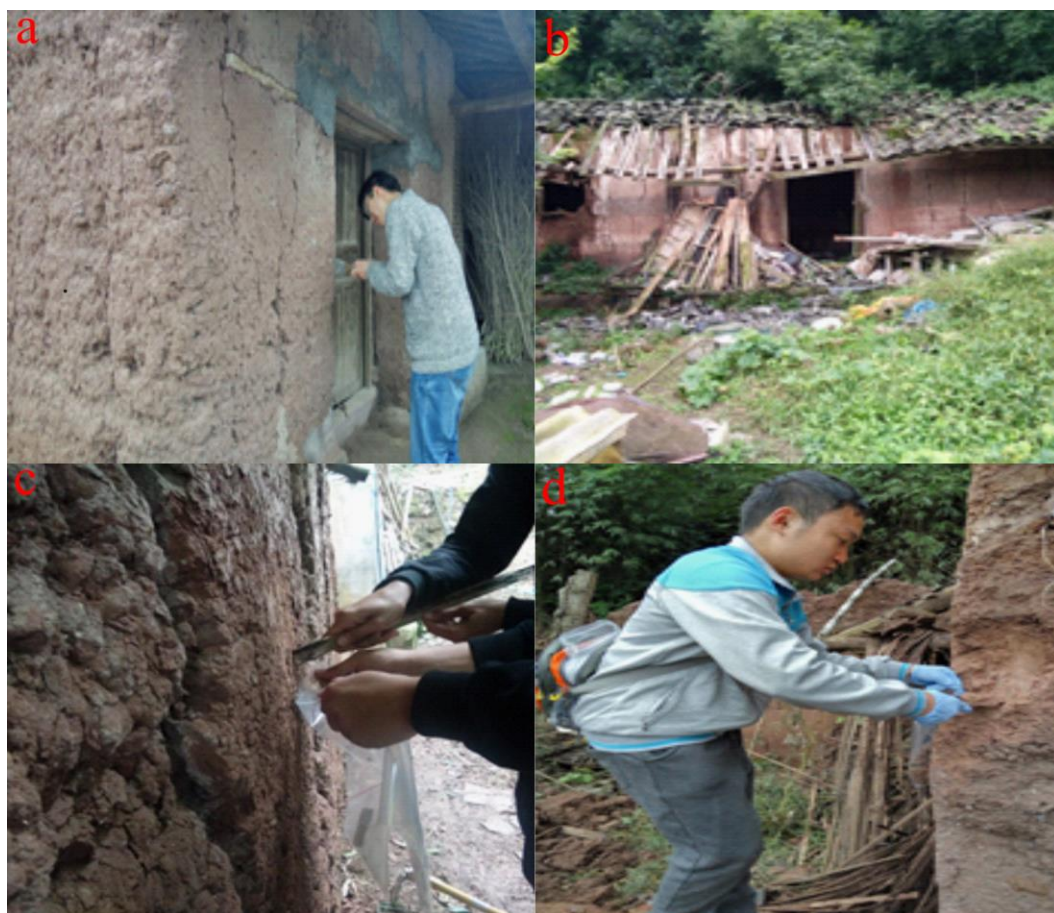

**Figure S5.** The soil depth and Cd concentration

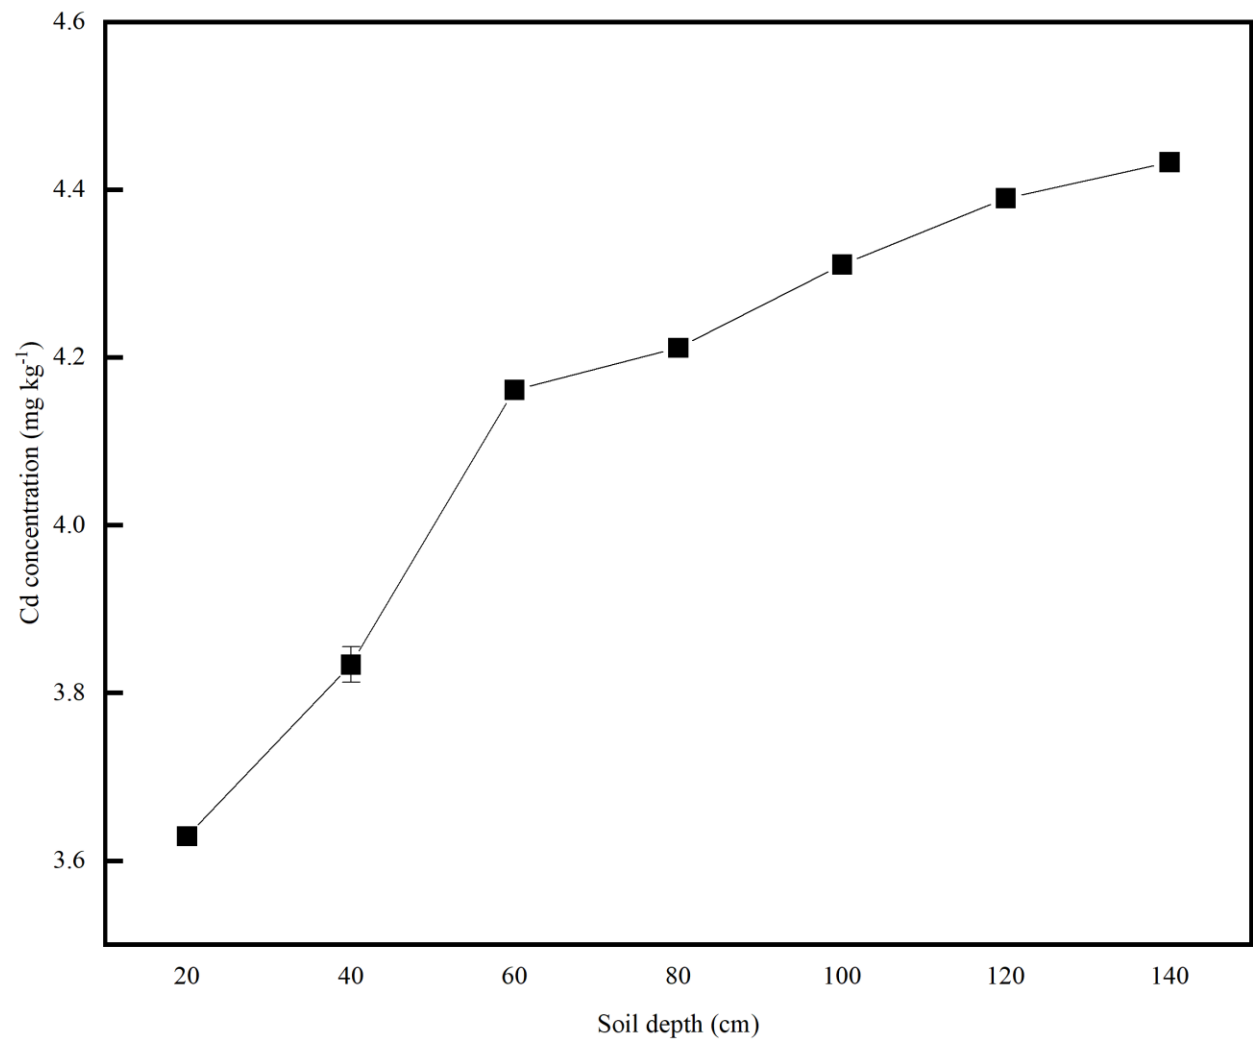

Supplement: s1 [file s1]
